# Supplementary material
Source: PubMed Central journal article supplement (PMC4096784)
Supplement: NIHMS578765-supplement-01.pdf [file NIHMS578765-supplement-01.pdf]

## Supplemental material

### Enhanced risk profiling of implanted defibrillator shocks with circulating SCN5A mRNA splicing variants: a pilot trial

Ge Gao MD, PhD\*, Vikram Brahmanandam MD\*, Mihai Raicu MS\*, Lianzhi Gu MD, PhD\*, Li Zhou MD, PhD\*, Srinivasan Kasturirangan MD\*, Anish Shah BS<sup>†</sup>, Smita I. Negi MD<sup>‡</sup>, Melissa R. Wood MD\*, Ankit A. Desai MD<sup>\*^</sup>, Antone Tatoes MD<sup>#</sup>, Alan Schwartz PhD<sup>§</sup>, Samuel C. Dudley, Jr. MD, PhD\*

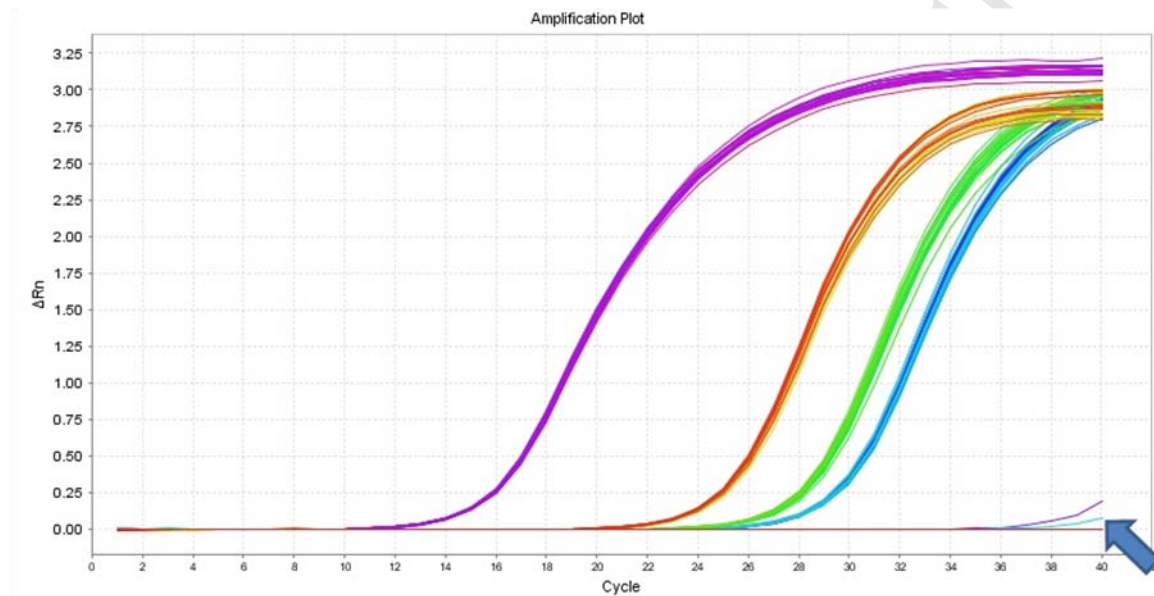

**Supplemental Figure 1. Representative qRT-PCR amplification plots.** The purple curves show the amplification of housekeeping gene. The amplification of the target genes SCN5A (red curves), variant C (blue curves), and variant D (green curves) are shown. The arrow indicates the negative controls.

## Supplemental material

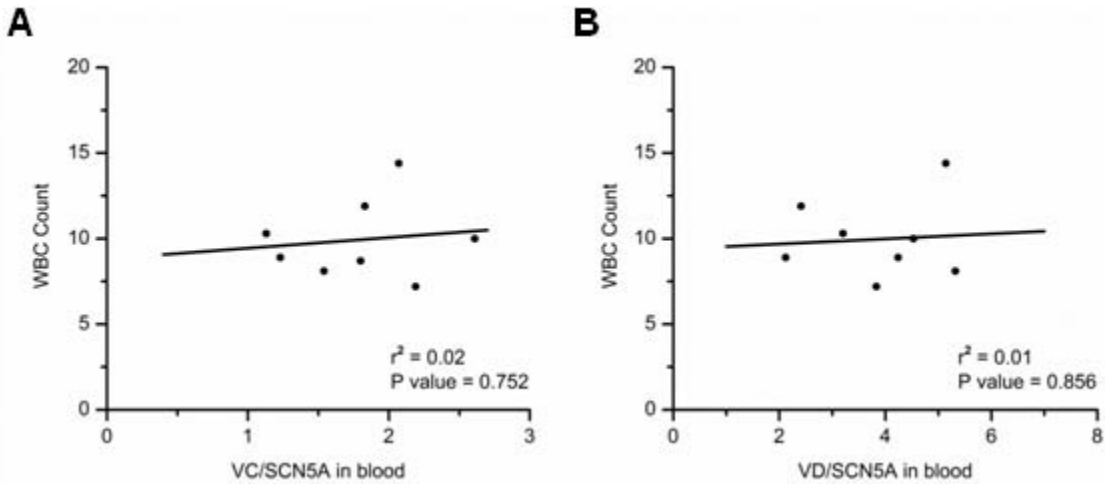

**Supplemental Figure 2. The correlation of WBC count and WBC mRNA abundances of SCN5A variants VC and VD.** Panel A shows WBC count as a function of WBC variant VC levels measured in the same patient. Panel B shows WBC count as a function of WBC variant VD levels measured in the same patient. The best-fit linear regression is displayed as a solid black line. Paired analysis of SCN5A variants from circulating WBC and WBC count demonstrated the correlation as  $r = 0.13$  and  $0.08$ , respectively for variants VC and VD.

## Supplemental material

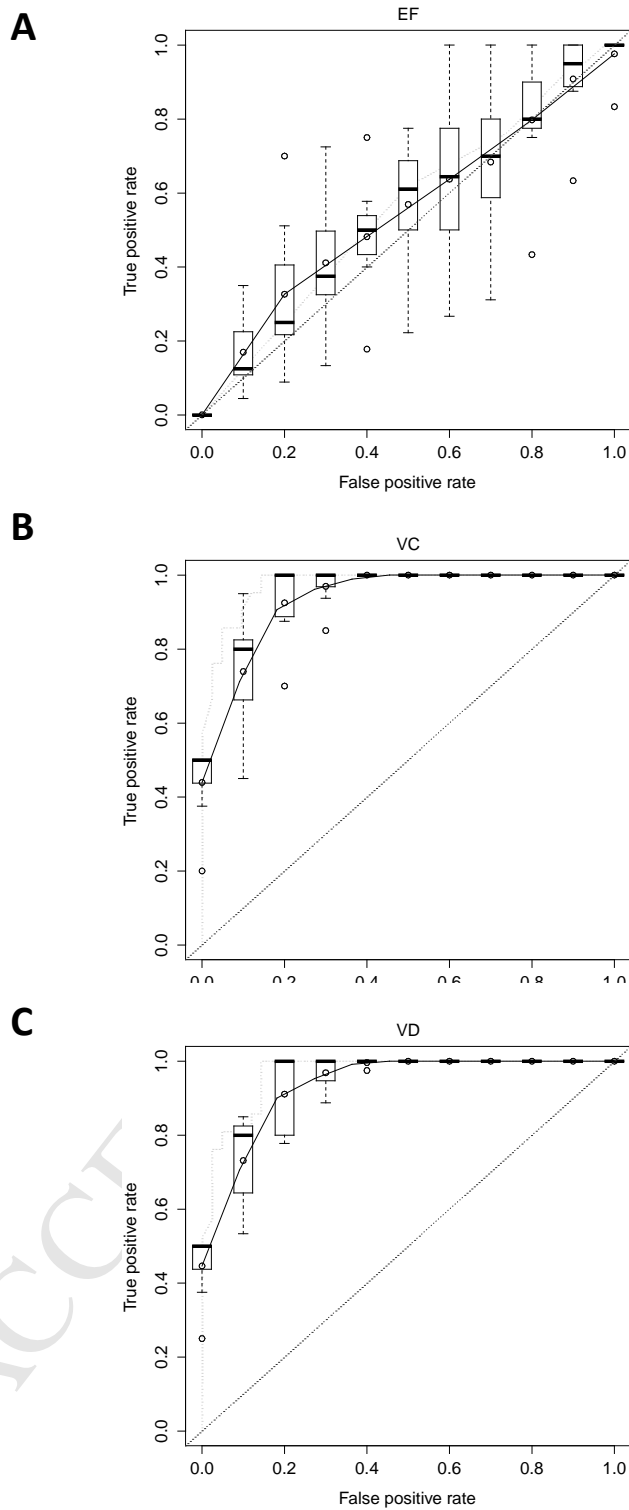

## Supplemental material

**Supplemental Figure 3. Both VC (B) and VD (C) variants provided superior predictive performance to LVEF (A) in our data set.** The distribution of sensitivity and specificity values for cutoffs are based on the regressions derived using R 3.0.1 of the ROCR package. In order to conduct a sevenfold cross-validation, the ICD(-)event and ICD(+)event data (n=63) were randomly partitioned into seven folds (n=9 data points per fold), and seven training data sets (each n=54) were constructed by omitted each fold in turn from the data. The cross-validation code used was disseminated by Weiss (<http://www.unc.edu/courses/2006spring/ecol/145/001/docs/lectures/lecture39.htm>). The logistic regression models were fitted for each training data set, and then applied to predict the omitted fold, generating a sensitivity and specificity value at each cutoff. The ROC curve displays the distributions of these sensitivity/specificity values at each cutoff with boxplots. The plots suggest that both VC (panel B) and VD (panel C) variants provided superior predictive performance to LVEF (panel A) in our data set. The presentation convention follows Tobias et al. (ROCR: visualizing classifier performance in R. *Bioinformatics* 2005; 20: 3940-3941). In these plots, the line is the median. The box is the interquartile range. The whiskers are 1.5 times the interquartile range. The open dot in the box is the mean.

## Supplemental material

Supplemental Table 2. Quantitative real-time reverse transcriptase polymerase chain reaction data

## A. Quantification cycles in triplicate for Control patients

| Patient ID | SCN5A |       |       |         | VC    |       |       |         | VD    |       |       |         | β-actin |       |       |         |
|------------|-------|-------|-------|---------|-------|-------|-------|---------|-------|-------|-------|---------|---------|-------|-------|---------|
|            | Data1 | Data2 | Data3 | Average | Data1 | Data2 | Data3 | Average | Data1 | Data2 | Data3 | Average | Data1   | Data2 | Data3 | Average |
| Control-1  | 26.13 | 26.02 | 26.18 | 26.11   | 31.12 | 30.95 | 31.00 | 31.02   | 29.98 | 29.87 | 29.95 | 29.93   | 16.21   | 16.03 | 16.15 | 16.13   |
| Control-2  | 26.65 | 26.50 | 26.63 | 26.59   | 31.12 | 31.03 | 31.18 | 31.11   | 29.63 | 29.48 | 29.51 | 29.54   | 16.30   | 16.15 | 16.18 | 16.21   |
| Control-3  | 26.43 | 26.29 | 26.28 | 26.33   | 30.97 | 30.86 | 30.99 | 30.94   | 29.75 | 29.62 | 29.64 | 29.67   | 16.54   | 16.43 | 16.50 | 16.49   |
| Control-4  | 26.38 | 26.18 | 26.28 | 26.28   | 30.72 | 30.60 | 30.73 | 30.68   | 29.88 | 29.72 | 29.77 | 29.79   | 16.76   | 16.67 | 16.61 | 16.68   |
| Control-5  | 26.23 | 26.18 | 26.25 | 26.22   | 31.36 | 31.35 | 31.37 | 31.36   | 29.83 | 29.65 | 29.77 | 29.75   | 16.78   | 16.63 | 16.69 | 16.70   |
| Control-6  | 26.13 | 26.05 | 26.12 | 26.10   | 30.92 | 30.77 | 30.86 | 30.85   | 29.35 | 29.28 | 29.30 | 29.31   | 16.40   | 16.23 | 16.33 | 16.32   |
| Control-7  | 26.15 | 26.13 | 26.17 | 26.15   | 30.72 | 30.67 | 30.68 | 30.69   | 30.00 | 29.91 | 30.03 | 29.98   | 16.94   | 16.82 | 16.79 | 16.85   |
| Control-8  | 26.29 | 26.24 | 26.20 | 26.24   | 31.46 | 31.37 | 31.43 | 31.42   | 29.97 | 29.90 | 29.95 | 29.94   | 16.83   | 16.71 | 16.89 | 16.81   |
| Control-9  | 26.61 | 26.49 | 26.58 | 26.56   | 30.79 | 30.74 | 30.72 | 30.75   | 29.22 | 29.16 | 29.28 | 29.22   | 16.40   | 16.29 | 16.46 | 16.38   |
| Control-10 | 26.55 | 26.51 | 26.51 | 26.52   | 31.43 | 31.30 | 31.26 | 31.33   | 29.48 | 29.33 | 29.42 | 29.41   | 16.75   | 16.73 | 16.72 | 16.73   |
| Control-11 | 26.28 | 26.18 | 26.34 | 26.27   | 31.27 | 31.22 | 31.17 | 31.22   | 30.20 | 30.13 | 30.15 | 30.16   | 16.72   | 16.61 | 16.64 | 16.66   |
| Control-12 | 26.44 | 26.35 | 26.49 | 26.43   | 30.73 | 30.67 | 30.73 | 30.71   | 30.13 | 30.02 | 30.15 | 30.10   | 16.43   | 16.27 | 16.32 | 16.34   |
| Control-13 | 26.61 | 26.46 | 26.51 | 26.53   | 30.95 | 30.92 | 30.95 | 30.94   | 29.54 | 29.42 | 29.60 | 29.52   | 16.53   | 16.36 | 16.46 | 16.45   |
| Control-14 | 26.41 | 26.27 | 26.28 | 26.32   | 31.66 | 31.55 | 31.52 | 31.58   | 29.69 | 29.60 | 29.63 | 29.64   | 16.83   | 16.75 | 16.79 | 16.79   |
| Control-15 | 26.98 | 26.82 | 26.93 | 26.91   | 31.16 | 30.98 | 31.05 | 31.06   | 29.30 | 29.18 | 29.28 | 29.25   | 16.61   | 16.46 | 16.49 | 16.52   |
| Control-16 | 26.61 | 26.49 | 26.52 | 26.54   | 31.46 | 31.40 | 31.43 | 31.43   | 29.90 | 29.79 | 29.77 | 29.82   | 16.61   | 16.52 | 16.58 | 16.57   |
| Control-17 | 26.27 | 26.18 | 26.33 | 26.26   | 30.75 | 30.67 | 30.64 | 30.69   | 29.27 | 29.21 | 29.32 | 29.27   | 16.94   | 16.88 | 16.89 | 16.90   |
| Control-18 | 26.57 | 26.46 | 26.44 | 26.49   | 31.55 | 31.54 | 31.53 | 31.54   | 29.69 | 29.57 | 29.63 | 29.63   | 16.14   | 16.05 | 16.17 | 16.12   |
| Control-19 | 26.36 | 26.22 | 26.36 | 26.31   | 31.09 | 31.04 | 31.02 | 31.05   | 29.64 | 29.55 | 29.49 | 29.56   | 16.24   | 16.14 | 16.07 | 16.15   |
| Control-20 | 26.57 | 26.47 | 26.64 | 26.56   | 31.44 | 31.29 | 31.38 | 31.37   | 29.82 | 29.72 | 29.87 | 29.80   | 16.37   | 16.20 | 16.25 | 16.27   |
| Control-21 | 26.13 | 26.01 | 26.08 | 26.07   | 30.82 | 30.74 | 30.78 | 30.78   | 29.15 | 29.05 | 29.20 | 29.13   | 16.46   | 16.40 | 16.45 | 16.44   |
| Control-22 | 26.90 | 26.75 | 26.84 | 26.83   | 31.29 | 31.26 | 31.24 | 31.26   | 29.87 | 29.87 | 29.87 | 29.87   | 16.27   | 16.21 | 16.21 | 16.23   |
| Control-23 | 26.30 | 26.24 | 26.33 | 26.29   | 31.15 | 31.00 | 31.14 | 31.10   | 29.72 | 29.69 | 29.72 | 29.71   | 16.87   | 16.80 | 16.79 | 16.82   |
| Control-24 | 26.62 | 26.47 | 26.57 | 26.55   | 30.91 | 30.87 | 30.89 | 30.89   | 29.45 | 29.37 | 29.53 | 29.45   | 16.25   | 16.16 | 16.07 | 16.16   |
| Control-25 | 26.42 | 26.28 | 26.44 | 26.38   | 31.37 | 31.20 | 31.30 | 31.29   | 29.16 | 29.15 | 29.17 | 29.16   | 16.68   | 16.63 | 16.58 | 16.63   |
| Control-26 | 26.33 | 26.24 | 26.24 | 26.27   | 31.67 | 31.48 | 31.56 | 31.57   | 29.44 | 29.34 | 29.37 | 29.38   | 16.59   | 16.44 | 16.58 | 16.54   |
| Control-27 | 26.22 | 26.17 | 26.22 | 26.20   | 30.83 | 30.80 | 30.80 | 30.81   | 29.49 | 29.38 | 29.57 | 29.48   | 16.50   | 16.35 | 16.38 | 16.41   |
| Control-28 | 26.40 | 26.32 | 26.30 | 26.34   | 31.55 | 31.40 | 31.52 | 31.49   | 29.22 | 29.12 | 29.08 | 29.14   | 16.36   | 16.28 | 16.23 | 16.29   |

## Supplemental material

## B. Quantification cycles in triplicate for Heart Failure (HF) patients

| Patient ID | SCN5A |       |       |         | VC    |       |       |         | VD    |       |       |         | β-actin |       |       |         |
|------------|-------|-------|-------|---------|-------|-------|-------|---------|-------|-------|-------|---------|---------|-------|-------|---------|
|            | Data1 | Data2 | Data3 | Average | Data1 | Data2 | Data3 | Average | Data1 | Data2 | Data3 | Average | Data1   | Data2 | Data3 | Average |
| HF-1       | 28.02 | 27.94 | 27.96 | 27.97   | 31.46 | 31.33 | 31.32 | 31.37   | 29.67 | 29.58 | 29.55 | 29.60   | 17.73   | 17.67 | 17.74 | 17.71   |
| HF-2       | 26.59 | 26.56 | 26.60 | 26.58   | 29.97 | 29.90 | 29.89 | 29.92   | 28.21 | 28.15 | 28.12 | 28.16   | 16.39   | 16.39 | 16.39 | 16.39   |
| HF-3       | 26.35 | 26.25 | 26.16 | 26.25   | 30.09 | 29.95 | 30.08 | 30.04   | 27.97 | 27.93 | 28.01 | 27.97   | 17.61   | 17.46 | 17.56 | 17.54   |
| HF-4       | 26.98 | 26.91 | 26.84 | 26.91   | 30.85 | 30.78 | 30.72 | 30.78   | 28.79 | 28.67 | 28.77 | 28.74   | 15.20   | 15.08 | 15.23 | 15.17   |
| HF-5       | 25.96 | 25.94 | 25.98 | 25.96   | 30.10 | 30.09 | 30.11 | 30.10   | 27.88 | 27.78 | 27.89 | 27.85   | 16.06   | 15.97 | 16.13 | 16.05   |
| HF-6       | 27.58 | 27.46 | 27.57 | 27.54   | 30.69 | 30.61 | 30.60 | 30.63   | 29.04 | 28.93 | 28.98 | 28.98   | 17.18   | 17.11 | 17.07 | 17.12   |
| HF-7       | 27.62 | 27.58 | 27.60 | 27.60   | 33.13 | 33.03 | 33.02 | 33.06   | 29.75 | 29.69 | 29.78 | 29.74   | 15.91   | 15.79 | 15.82 | 15.84   |
| HF-8       | 26.21 | 26.10 | 26.11 | 26.14   | 29.73 | 29.64 | 29.79 | 29.72   | 27.86 | 27.79 | 27.78 | 27.81   | 15.36   | 15.23 | 15.20 | 15.26   |
| HF-9       | 25.85 | 25.74 | 25.87 | 25.82   | 29.15 | 29.04 | 29.15 | 29.11   | 27.43 | 27.36 | 27.42 | 27.40   | 16.34   | 16.30 | 16.35 | 16.33   |
| HF-10      | 27.73 | 27.67 | 27.67 | 27.69   | 30.93 | 30.92 | 30.91 | 30.92   | 29.22 | 29.20 | 29.24 | 29.22   | 17.51   | 17.47 | 17.50 | 17.49   |
| HF-11      | 25.89 | 25.83 | 25.78 | 25.83   | 30.08 | 30.03 | 30.07 | 30.06   | 27.86 | 27.74 | 27.75 | 27.78   | 16.96   | 16.89 | 17.00 | 16.95   |
| HF-12      | 26.11 | 25.96 | 26.07 | 26.05   | 34.10 | 34.05 | 34.12 | 34.09   | 28.67 | 28.52 | 28.56 | 28.58   | 17.54   | 17.44 | 17.52 | 17.50   |
| HF-13      | 27.96 | 27.84 | 27.84 | 27.88   | 31.63 | 31.52 | 31.45 | 31.53   | 29.66 | 29.57 | 29.58 | 29.60   | 15.18   | 15.08 | 15.16 | 15.14   |
| HF-14      | 27.77 | 27.69 | 27.76 | 27.74   | 32.12 | 32.01 | 32.12 | 32.08   | 29.76 | 29.61 | 29.69 | 29.69   | 16.62   | 16.43 | 16.52 | 16.52   |
| HF-15      | 25.78 | 25.67 | 25.65 | 25.70   | 29.40 | 29.30 | 29.35 | 29.35   | 27.50 | 27.40 | 27.54 | 27.48   | 17.47   | 17.36 | 17.32 | 17.38   |
| HF-16      | 25.42 | 25.31 | 25.24 | 25.32   | 28.52 | 28.46 | 28.53 | 28.50   | 26.89 | 26.82 | 26.84 | 26.85   | 15.22   | 15.19 | 15.23 | 15.21   |
| HF-17      | 27.04 | 27.01 | 27.02 | 27.02   | 30.17 | 30.10 | 30.22 | 30.16   | 28.55 | 28.43 | 28.55 | 28.51   | 15.84   | 15.73 | 15.66 | 15.74   |
| HF-18      | 27.58 | 27.47 | 27.48 | 27.51   | 31.31 | 31.19 | 31.19 | 31.23   | 29.28 | 29.14 | 29.27 | 29.23   | 16.01   | 15.99 | 16.03 | 16.01   |
| HF-19      | 25.14 | 24.96 | 25.03 | 25.04   | 28.65 | 28.49 | 28.55 | 28.56   | 26.79 | 26.62 | 26.72 | 26.71   | 17.85   | 17.76 | 17.88 | 17.83   |
| HF-20      | 27.39 | 27.27 | 27.45 | 27.37   | 30.92 | 30.77 | 30.80 | 30.83   | 29.04 | 28.92 | 29.04 | 29.00   | 16.80   | 16.69 | 16.86 | 16.78   |
| HF-21      | 26.55 | 26.36 | 26.47 | 26.46   | 30.50 | 30.34 | 30.40 | 30.41   | 28.32 | 28.25 | 28.30 | 28.29   | 17.97   | 17.87 | 17.95 | 17.93   |
| HF-22      | 25.46 | 25.33 | 25.39 | 25.39   | 29.52 | 29.41 | 29.37 | 29.43   | 27.37 | 27.22 | 27.25 | 27.28   | 15.48   | 15.31 | 15.42 | 15.40   |
| HF-23      | 25.25 | 25.08 | 25.18 | 25.17   | 31.69 | 31.56 | 31.64 | 31.63   | 27.55 | 27.43 | 27.37 | 27.45   | 16.70   | 16.57 | 16.68 | 16.65   |
| HF-24      | 27.54 | 27.49 | 27.56 | 27.53   | 30.48 | 30.38 | 30.46 | 30.44   | 28.91 | 28.80 | 28.85 | 28.85   | 17.28   | 17.16 | 17.13 | 17.19   |
| HF-25      | 25.22 | 25.11 | 25.06 | 25.13   | 28.94 | 28.86 | 28.96 | 28.92   | 26.95 | 26.85 | 26.93 | 26.91   | 15.51   | 15.39 | 15.45 | 15.45   |
| HF-26      | 26.28 | 26.18 | 26.14 | 26.20   | 29.74 | 29.67 | 29.75 | 29.72   | 28.02 | 27.92 | 27.83 | 27.92   | 15.43   | 15.27 | 15.38 | 15.36   |
| HF-27      | 25.52 | 25.42 | 25.54 | 25.49   | 27.91 | 27.79 | 27.79 | 27.83   | 26.83 | 26.74 | 26.86 | 26.81   | 16.57   | 16.47 | 16.40 | 16.48   |
| HF-28      | 27.82 | 27.70 | 27.76 | 27.76   | 31.51 | 31.47 | 31.47 | 31.48   | 29.66 | 29.56 | 29.56 | 29.59   | 17.67   | 17.54 | 17.50 | 17.57   |
| HF-29      | 27.78 | 27.62 | 27.74 | 27.71   | 33.23 | 33.15 | 33.13 | 33.17   | 30.15 | 30.06 | 30.00 | 30.07   | 16.08   | 16.01 | 16.15 | 16.08   |
| HF-30      | 26.74 | 26.56 | 26.65 | 26.65   | 30.30 | 30.19 | 30.20 | 30.23   | 28.36 | 28.28 | 28.32 | 28.32   | 17.32   | 17.14 | 17.21 | 17.22   |
| HF-31      | 26.35 | 26.23 | 26.35 | 26.31   | 30.10 | 29.96 | 30.03 | 30.03   | 28.16 | 28.04 | 28.07 | 28.09   | 15.83   | 15.75 | 15.83 | 15.80   |
| HF-32      | 26.88 | 26.80 | 26.75 | 26.81   | 31.37 | 31.25 | 31.19 | 31.27   | 28.89 | 28.78 | 28.78 | 28.82   | 16.37   | 16.21 | 16.34 | 16.31   |
| HF-33      | 27.18 | 27.00 | 27.06 | 27.08   | 30.91 | 30.80 | 30.90 | 30.87   | 28.91 | 28.76 | 28.91 | 28.86   | 17.33   | 17.18 | 17.30 | 17.27   |
| HF-34      | 26.96 | 26.92 | 26.97 | 26.95   | 30.46 | 30.36 | 30.41 | 30.41   | 28.57 | 28.43 | 28.59 | 28.53   | 15.65   | 15.59 | 15.62 | 15.62   |
| HF-35      | 25.55 | 25.39 | 25.50 | 25.48   | 29.04 | 28.91 | 29.05 | 29.00   | 27.20 | 27.12 | 27.13 | 27.15   | 15.75   | 15.67 | 15.65 | 15.69   |
| HF-36      | 26.24 | 26.13 | 26.31 | 26.23   | 29.27 | 29.21 | 29.21 | 29.23   | 27.56 | 27.55 | 27.55 | 27.55   | 16.84   | 16.70 | 16.77 | 16.77   |
| HF-37      | 25.71 | 25.60 | 25.58 | 25.63   | 29.90 | 29.84 | 29.84 | 29.86   | 27.75 | 27.66 | 27.69 | 27.70   | 17.70   | 17.54 | 17.56 | 17.60   |
| HF-38      | 25.31 | 25.23 | 25.24 | 25.26   | 28.53 | 28.34 | 28.45 | 28.44   | 26.83 | 26.71 | 26.84 | 26.79   | 16.37   | 16.23 | 16.24 | 16.28   |
| HF-39      | 26.26 | 26.17 | 26.14 | 26.19   | 30.03 | 29.92 | 29.98 | 29.98   | 28.04 | 27.93 | 28.09 | 28.02   | 15.18   | 15.09 | 15.06 | 15.11   |
| HF-40      | 25.57 | 25.56 | 25.58 | 25.57   | 29.16 | 29.09 | 29.20 | 29.15   | 27.38 | 27.32 | 27.36 | 27.35   | 15.08   | 15.02 | 14.99 | 15.03   |
| HF-41      | 27.07 | 26.96 | 27.06 | 27.03   | 31.19 | 31.16 | 31.16 | 31.17   | 29.05 | 29.02 | 29.05 | 29.04   | 16.32   | 16.19 | 16.21 | 16.24   |
| HF-42      | 25.22 | 25.10 | 25.05 | 25.12   | 28.86 | 28.73 | 28.73 | 28.77   | 26.84 | 26.75 | 26.67 | 26.75   | 17.89   | 17.82 | 17.87 | 17.86   |
| HF-43      | 25.99 | 25.80 | 25.91 | 25.90   | 29.83 | 29.67 | 29.81 | 29.77   | 28.13 | 27.99 | 27.99 | 28.04   | 16.79   | 16.70 | 16.70 | 16.73   |

## Supplemental material

## C. Quantification cycles in triplicate for those with HF, an ICD, and no evidence of appropriate event-driven therapy [ICD(-)Event]

| Patient ID     | SCN5A |       |       |         | VC    |       |       |         | VD    |       |       |         | β-actin |       |       |         |
|----------------|-------|-------|-------|---------|-------|-------|-------|---------|-------|-------|-------|---------|---------|-------|-------|---------|
|                | Data1 | Data2 | Data3 | Average | Data1 | Data2 | Data3 | Average | Data1 | Data2 | Data3 | Average | Data1   | Data2 | Data3 | Average |
| ICD(-)Event-1  | 25.83 | 25.80 | 25.77 | 25.80   | 31.84 | 31.78 | 31.89 | 31.84   | 32.35 | 32.24 | 32.40 | 32.33   | 15.99   | 15.87 | 16.03 | 15.96   |
| ICD(-)Event-2  | 27.22 | 27.09 | 27.17 | 27.16   | 30.60 | 30.56 | 30.52 | 30.56   | 29.72 | 29.61 | 29.74 | 29.69   | 17.17   | 17.07 | 16.98 | 17.07   |
| ICD(-)Event-3  | 25.54 | 25.38 | 25.49 | 25.47   | 28.89 | 28.77 | 28.76 | 28.81   | 28.09 | 27.91 | 28.00 | 28.00   | 15.48   | 15.41 | 15.34 | 15.41   |
| ICD(-)Event-4  | 26.39 | 26.25 | 26.28 | 26.31   | 29.89 | 29.80 | 29.98 | 29.89   | 29.57 | 29.45 | 29.54 | 29.52   | 16.36   | 16.21 | 16.31 | 16.29   |
| ICD(-)Event-5  | 27.87 | 27.75 | 27.75 | 27.79   | 31.70 | 31.59 | 31.69 | 31.66   | 31.40 | 31.25 | 31.31 | 31.32   | 17.46   | 17.35 | 17.33 | 17.38   |
| ICD(-)Event-6  | 25.97 | 25.88 | 25.95 | 25.93   | 29.36 | 29.31 | 29.32 | 29.33   | 28.86 | 28.67 | 28.75 | 28.76   | 16.68   | 16.65 | 16.68 | 16.67   |
| ICD(-)Event-7  | 27.36 | 27.19 | 27.29 | 27.28   | 30.86 | 30.79 | 30.75 | 30.80   | 30.25 | 30.22 | 30.22 | 30.23   | 17.33   | 17.22 | 17.23 | 17.26   |
| ICD(-)Event-8  | 26.61 | 26.42 | 26.50 | 26.51   | 29.85 | 29.78 | 29.78 | 29.80   | 29.02 | 28.89 | 28.95 | 28.95   | 15.80   | 15.67 | 15.75 | 15.74   |
| ICD(-)Event-9  | 26.18 | 26.12 | 26.21 | 26.17   | 29.35 | 29.18 | 29.25 | 29.26   | 28.26 | 28.14 | 28.32 | 28.24   | 16.92   | 16.87 | 16.91 | 16.90   |
| ICD(-)Event-10 | 25.05 | 25.00 | 25.09 | 25.05   | 28.32 | 28.21 | 28.16 | 28.23   | 27.42 | 27.36 | 27.45 | 27.41   | 15.74   | 15.57 | 15.68 | 15.66   |
| ICD(-)Event-11 | 27.81 | 27.67 | 27.77 | 27.75   | 30.34 | 30.23 | 30.33 | 30.30   | 29.11 | 28.95 | 29.03 | 29.03   | 16.46   | 16.35 | 16.55 | 16.45   |
| ICD(-)Event-12 | 25.76 | 25.68 | 25.63 | 25.69   | 28.12 | 28.03 | 28.04 | 28.06   | 26.91 | 26.83 | 26.96 | 26.90   | 17.13   | 17.00 | 17.10 | 17.08   |
| ICD(-)Event-13 | 27.98 | 27.90 | 28.03 | 27.97   | 32.18 | 32.06 | 32.09 | 32.11   | 32.28 | 32.16 | 32.10 | 32.18   | 15.77   | 15.69 | 15.82 | 15.76   |
| ICD(-)Event-14 | 26.11 | 25.93 | 26.00 | 26.01   | 30.60 | 30.50 | 30.67 | 30.59   | 30.56 | 30.48 | 30.58 | 30.54   | 15.89   | 15.76 | 15.87 | 15.84   |
| ICD(-)Event-15 | 25.87 | 25.81 | 25.90 | 25.86   | 30.91 | 30.81 | 30.98 | 30.90   | 31.43 | 31.32 | 31.42 | 31.39   | 17.95   | 17.87 | 17.95 | 17.92   |
| ICD(-)Event-16 | 26.68 | 26.53 | 26.53 | 26.58   | 30.13 | 30.04 | 29.95 | 30.04   | 29.10 | 28.95 | 29.01 | 29.02   | 16.27   | 16.16 | 16.08 | 16.17   |
| ICD(-)Event-17 | 27.36 | 27.19 | 27.32 | 27.29   | 30.70 | 30.58 | 30.62 | 30.63   | 29.72 | 29.61 | 29.62 | 29.65   | 15.84   | 15.80 | 15.76 | 15.80   |
| ICD(-)Event-18 | 26.94 | 26.81 | 26.80 | 26.85   | 30.17 | 30.07 | 30.18 | 30.14   | 29.63 | 29.54 | 29.54 | 29.57   | 15.18   | 15.09 | 15.21 | 15.16   |
| ICD(-)Event-19 | 25.83 | 25.76 | 25.69 | 25.76   | 29.48 | 29.38 | 29.38 | 29.41   | 28.06 | 27.89 | 27.96 | 27.97   | 17.71   | 17.62 | 17.60 | 17.64   |
| ICD(-)Event-20 | 27.10 | 26.92 | 26.99 | 27.00   | 30.98 | 30.91 | 30.95 | 30.95   | 30.41 | 30.33 | 30.34 | 30.36   | 16.90   | 16.80 | 16.73 | 16.81   |
| ICD(-)Event-21 | 25.92 | 25.81 | 25.91 | 25.88   | 29.18 | 29.01 | 29.14 | 29.11   | 28.42 | 28.32 | 28.49 | 28.41   | 16.07   | 15.92 | 16.02 | 16.00   |
| ICD(-)Event-22 | 25.44 | 25.31 | 25.43 | 25.39   | 28.96 | 28.88 | 28.89 | 28.91   | 27.94 | 27.86 | 27.97 | 27.92   | 16.51   | 16.42 | 16.35 | 16.43   |
| ICD(-)Event-23 | 27.56 | 27.40 | 27.53 | 27.50   | 31.06 | 30.93 | 30.89 | 30.96   | 29.86 | 29.71 | 29.77 | 29.78   | 15.53   | 15.49 | 15.52 | 15.51   |
| ICD(-)Event-24 | 26.37 | 26.33 | 26.32 | 26.34   | 29.45 | 29.35 | 29.49 | 29.43   | 28.65 | 28.54 | 28.67 | 28.62   | 16.34   | 16.24 | 16.38 | 16.32   |
| ICD(-)Event-25 | 26.63 | 26.56 | 26.59 | 26.59   | 29.45 | 29.29 | 29.39 | 29.38   | 28.62 | 28.55 | 28.63 | 28.60   | 17.98   | 17.86 | 17.95 | 17.93   |
| ICD(-)Event-26 | 27.63 | 27.59 | 27.67 | 27.63   | 29.75 | 29.66 | 29.67 | 29.69   | 28.30 | 28.14 | 28.19 | 28.21   | 16.32   | 16.21 | 16.22 | 16.25   |
| ICD(-)Event-27 | 26.48 | 26.35 | 26.37 | 26.40   | 28.29 | 28.23 | 28.30 | 28.27   | 26.98 | 26.85 | 26.90 | 26.91   | 17.27   | 17.21 | 17.21 | 17.23   |
| ICD(-)Event-28 | 25.47 | 25.29 | 25.38 | 25.38   | 29.48 | 29.38 | 29.41 | 29.42   | 29.62 | 29.54 | 29.62 | 29.59   | 15.46   | 15.32 | 15.47 | 15.42   |
| ICD(-)Event-29 | 25.77 | 25.64 | 25.75 | 25.72   | 30.24 | 30.18 | 30.13 | 30.18   | 30.34 | 30.18 | 30.23 | 30.25   | 17.64   | 17.52 | 17.61 | 17.59   |
| ICD(-)Event-30 | 27.68 | 27.52 | 27.61 | 27.60   | 30.18 | 30.00 | 30.09 | 30.09   | 28.78 | 28.67 | 28.86 | 28.77   | 15.72   | 15.59 | 15.64 | 15.65   |
| ICD(-)Event-31 | 26.65 | 26.58 | 26.63 | 26.62   | 28.98 | 28.88 | 28.87 | 28.91   | 27.85 | 27.72 | 27.71 | 27.76   | 17.13   | 17.02 | 17.15 | 17.10   |
| ICD(-)Event-32 | 25.94 | 25.86 | 25.90 | 25.90   | 29.24 | 29.12 | 29.21 | 29.19   | 28.22 | 28.15 | 28.18 | 28.18   | 16.58   | 16.55 | 16.58 | 16.57   |
| ICD(-)Event-33 | 25.30 | 25.20 | 25.22 | 25.24   | 28.57 | 28.38 | 28.46 | 28.47   | 27.93 | 27.83 | 27.85 | 27.87   | 16.20   | 16.09 | 16.24 | 16.18   |
| ICD(-)Event-34 | 27.47 | 27.44 | 27.44 | 27.45   | 32.78 | 32.59 | 32.68 | 32.68   | 33.05 | 32.89 | 33.00 | 32.98   | 18.05   | 17.94 | 17.92 | 17.97   |
| ICD(-)Event-35 | 27.02 | 26.90 | 26.91 | 26.94   | 30.37 | 30.26 | 30.39 | 30.34   | 29.38 | 29.24 | 29.29 | 29.30   | 15.37   | 15.32 | 15.36 | 15.35   |
| ICD(-)Event-36 | 27.21 | 27.15 | 27.21 | 27.19   | 30.21 | 30.13 | 30.23 | 30.19   | 29.46 | 29.35 | 29.39 | 29.40   | 16.74   | 16.64 | 16.81 | 16.73   |
| ICD(-)Event-37 | 25.51 | 25.38 | 25.37 | 25.42   | 28.18 | 28.00 | 28.11 | 28.10   | 27.44 | 27.31 | 27.36 | 27.37   | 15.55   | 15.46 | 15.44 | 15.48   |
| ICD(-)Event-38 | 27.33 | 27.17 | 27.20 | 27.23   | 30.47 | 30.39 | 30.36 | 30.41   | 29.65 | 29.59 | 29.54 | 29.59   | 15.90   | 15.80 | 15.97 | 15.89   |
| ICD(-)Event-39 | 25.04 | 24.95 | 25.10 | 25.03   | 28.57 | 28.40 | 28.50 | 28.49   | 27.51 | 27.41 | 27.48 | 27.47   | 16.59   | 16.45 | 16.55 | 16.53   |
| ICD(-)Event-40 | 27.21 | 27.14 | 27.08 | 27.14   | 30.62 | 30.53 | 30.47 | 30.54   | 29.50 | 29.36 | 29.40 | 29.42   | 15.14   | 15.02 | 14.96 | 15.04   |
| ICD(-)Event-41 | 26.34 | 26.17 | 26.30 | 26.27   | 29.92 | 29.81 | 29.82 | 29.85   | 28.43 | 28.35 | 28.45 | 28.41   | 16.81   | 16.69 | 16.84 | 16.78   |
| ICD(-)Event-42 | 27.07 | 26.98 | 27.14 | 27.06   | 30.99 | 30.91 | 30.90 | 30.93   | 30.51 | 30.38 | 30.38 | 30.42   | 17.24   | 17.21 | 17.21 | 17.22   |

## Supplemental material

## D. Quantification cycles in triplicate for those with HF, an ICD, and evidence of appropriate event-driven therapy [ICD(+)/Event]

| Patient ID      | SCN5A |       |       |         | VC    |       |       |         | VD    |       |       |         | β-actin |       |       |         |
|-----------------|-------|-------|-------|---------|-------|-------|-------|---------|-------|-------|-------|---------|---------|-------|-------|---------|
|                 | Data1 | Data2 | Data3 | Average | Data1 | Data2 | Data3 | Average | Data1 | Data2 | Data3 | Average | Data1   | Data2 | Data3 | Average |
| ICD(+)/Event-1  | 28.97 | 28.88 | 28.85 | 28.90   | 30.81 | 30.74 | 30.70 | 30.75   | 29.48 | 29.35 | 29.34 | 29.39   | 17.98   | 17.87 | 17.88 | 17.91   |
| ICD(+)/Event-2  | 30.83 | 30.70 | 30.69 | 30.74   | 32.69 | 32.60 | 32.78 | 32.69   | 31.29 | 31.26 | 31.26 | 31.27   | 19.67   | 19.57 | 19.68 | 19.64   |
| ICD(+)/Event-3  | 29.40 | 29.32 | 29.40 | 29.37   | 31.31 | 31.21 | 31.26 | 31.26   | 29.93 | 29.84 | 29.99 | 29.92   | 18.23   | 18.16 | 18.12 | 18.17   |
| ICD(+)/Event-4  | 30.73 | 30.64 | 30.67 | 30.68   | 32.39 | 32.29 | 32.31 | 32.33   | 30.97 | 30.90 | 30.92 | 30.93   | 20.48   | 20.45 | 20.46 | 20.46   |
| ICD(+)/Event-5  | 29.94 | 29.83 | 29.84 | 29.87   | 31.37 | 31.33 | 31.32 | 31.34   | 30.00 | 29.84 | 29.96 | 29.93   | 18.45   | 18.33 | 18.37 | 18.38   |
| ICD(+)/Event-6  | 28.77 | 28.71 | 28.65 | 28.71   | 30.52 | 30.47 | 30.57 | 30.52   | 29.24 | 29.13 | 29.17 | 29.18   | 17.78   | 17.65 | 17.73 | 17.72   |
| ICD(+)/Event-7  | 30.25 | 30.23 | 30.21 | 30.23   | 31.99 | 31.87 | 31.99 | 31.95   | 30.63 | 30.60 | 30.60 | 30.61   | 20.48   | 20.36 | 20.48 | 20.44   |
| ICD(+)/Event-8  | 30.33 | 30.23 | 30.31 | 30.29   | 31.93 | 31.84 | 31.81 | 31.86   | 30.47 | 30.31 | 30.37 | 30.38   | 19.53   | 19.44 | 19.56 | 19.51   |
| ICD(+)/Event-9  | 29.41 | 29.35 | 29.44 | 29.40   | 31.31 | 31.26 | 31.24 | 31.27   | 29.95 | 29.89 | 29.95 | 29.93   | 18.93   | 18.90 | 18.96 | 18.93   |
| ICD(+)/Event-10 | 29.63 | 29.49 | 29.56 | 29.56   | 32.12 | 32.03 | 32.01 | 32.05   | 31.14 | 31.01 | 31.00 | 31.05   | 18.79   | 18.68 | 18.60 | 18.69   |
| ICD(+)/Event-11 | 30.12 | 29.98 | 30.05 | 30.05   | 32.30 | 32.25 | 32.29 | 32.28   | 31.34 | 31.25 | 31.31 | 31.30   | 19.10   | 19.01 | 19.10 | 19.07   |
| ICD(+)/Event-12 | 30.92 | 30.83 | 30.92 | 30.89   | 33.02 | 32.96 | 33.03 | 33.00   | 31.95 | 31.87 | 31.97 | 31.93   | 18.20   | 18.13 | 18.06 | 18.13   |
| ICD(+)/Event-13 | 28.69 | 28.53 | 28.61 | 28.61   | 31.33 | 31.24 | 31.21 | 31.26   | 30.11 | 30.10 | 30.09 | 30.10   | 19.33   | 19.29 | 19.35 | 19.32   |
| ICD(+)/Event-14 | 31.38 | 31.31 | 31.36 | 31.35   | 32.86 | 32.74 | 32.77 | 32.79   | 31.43 | 31.35 | 31.34 | 31.37   | 19.12   | 19.07 | 19.12 | 19.10   |
| ICD(+)/Event-15 | 29.22 | 29.11 | 29.15 | 29.16   | 31.00 | 30.85 | 30.98 | 30.94   | 29.66 | 29.59 | 29.55 | 29.60   | 20.35   | 20.22 | 20.21 | 20.26   |
| ICD(+)/Event-16 | 28.99 | 28.90 | 29.05 | 28.98   | 30.87 | 30.85 | 30.83 | 30.85   | 29.53 | 29.42 | 29.58 | 29.51   | 19.57   | 19.54 | 19.55 | 19.55   |
| ICD(+)/Event-17 | 31.25 | 31.17 | 31.30 | 31.24   | 32.93 | 32.86 | 32.79 | 32.86   | 31.49 | 31.42 | 31.45 | 31.45   | 17.83   | 17.74 | 17.68 | 17.75   |
| ICD(+)/Event-18 | 31.56 | 31.51 | 31.49 | 31.52   | 33.44 | 33.28 | 33.40 | 33.37   | 32.05 | 31.93 | 32.11 | 32.03   | 19.03   | 18.93 | 19.11 | 19.02   |
| ICD(+)/Event-19 | 30.11 | 29.98 | 29.97 | 30.02   | 32.50 | 32.41 | 32.53 | 32.48   | 31.49 | 31.36 | 31.53 | 31.46   | 18.25   | 18.18 | 18.17 | 18.20   |
| ICD(+)/Event-20 | 31.16 | 31.07 | 31.19 | 31.14   | 32.76 | 32.64 | 32.61 | 32.67   | 31.21 | 31.12 | 31.27 | 31.20   | 17.85   | 17.76 | 17.73 | 17.78   |
| ICD(+)/Event-21 | 29.49 | 29.36 | 29.45 | 29.43   | 31.16 | 31.02 | 31.16 | 31.11   | 29.80 | 29.75 | 29.82 | 29.79   | 18.95   | 18.81 | 18.91 | 18.89   |



**Supplemental material****Supplemental Table 2. Antiarrhythmic drug used by trial subjects**

| <b>Subject ID</b> | <b>Antiarrhythmic</b> |
|-------------------|-----------------------|
| HF-1              | amiodarone            |
| HF-2              | amiodarone            |
| ICD(-)Event -1    | amiodarone            |
| ICD(-)Event -2    | amiodarone            |
| ICD(-)Event -3    | amiodarone            |
| ICD(-)Event -4    | amiodarone            |
| ICD(+)Event-1     | digoxin               |
| ICD(+)Event-2     | amiodarone            |
| ICD(+)Event-3     | amiodarone            |
| ICD(+)Event-4     | amiodarone            |
| ICD(+)Event-5     | unspecified           |
| ICD(+)Event-6     | amiodarone            |
| ICD(+)Event-7     | sotalol               |
| ICD(+)Event-8     | amiodarone            |
